# Supplementary material for: Steroid hormones and chondrichthyan reproduction: physiological functions, scientific research, and implications for conservation
Source: PeerJ journal article supplement (doi:10.7717/peerj.9686), 2020-08-13
Supplement: Raw_data_for_steroids_in_Chondrichthyan_reproduction_review.xlsx [file Raw_data_for_steroids_in_Chondrichthyan_reproduction_review.xlsx]

## Sheet: Reproductive steroids
Year	Location	Group	Species	Common name	Reproductive mode	Hormones	Number of hormones	Tissue	Original volume per sample	Volume for analysis	Body area for sample collection	n males	n females	Methods	Recovery range (Min/Max)	Type of method	Statistics	Reference
2013	Maine	Shark	Squalus acanthias	Spiny dogfish shark	Lecitotrophic viviparous	E2, T, P4	3	M, G, P	5 g; 8 mL	2 g; 100 µL	Caudal venipuncture; Trunk down second dorsal fin	0	31	Radioimmunoassay	20-85	Invasive	Linear regression/Kendall correlation	Prohaska et al., 2013a
2013	Rhode Island	Shark	Rhizoprionodon terranovae	Atlantic Sharpnose shark	Placental viviparous	E2, T, P4	3	M, G, P	5 g; 8 mL	2 g; 100 µL	Caudal venipuncture; Trunk down second dorsal fin	0	10	Radioimmunoassay	39-87	Invasive	Linear regression/Kendall correlation	Prohaska et al., 2013a
2008	Tasmania	Shark	Cephalloscyllium laticeps	Draughtboard shark	Oviparous	E2, T, P4, 11-KT	4	P	3 mL	200 µL	Caudal venipuncture	113	118	Radioimmunoassay	74-88	Lethal	ANOVA/Tukey posthoc test	Awruch et al., 2008a
2008	Tasmania	Shark	Cephalloscyllium laticeps	Draughtboard shark	Oviparous	E2, T, P4	3	P	3 mL	200 µL	Caudal venipuncture	111	118	Radioimmunoassay	74-86	Lethal	Multidimensional scalling/ANOSIM	Awruch et al., 2008b
2009	Tasmania	Shark	Cephalloscyllium laticeps	Draughtboard shark	Oviparous	E2, T, P4	3	P	3 mL	200 µL	Caudal venipuncture	126	206	Radioimmunoassay	74-86	Lethal	ANOVA/Tukey posthoc test	Awruch et al., 2009
2014	Tasmania	Shark	Notorhynchus cepedianus	Broadnose sevengill shark	Lecitotrophic viviparous	E2, T, P4	3	P	3 mL	200 µL	Caudal venipuncture	15	69	Radioimmunoassay	83-92	Both	Linear regression	Awruch et al., 2014
2013	Maine	Shark	Squalus acanthias	Spiny dogfish shark	Lecitotrophic viviparous	E2, T, P4	3	P	5 mL	NM	Cardiac puncture	35	158	Radioimmunoassay	66.8-81.6	Lethal	ANOVA; Wilcoxon signed rank	Bubley et al., 2013
2002	Florida	Shark	Sphyrna tiburo	Bonnethead shark	Placental viviparous	E2, T, P4, DHT	4	Se	NM	500 µL	Caudal venipuncture	35	0	Radioimmunoassay	NM	Lethal	ANOVA; Fisher's LSD	Geslecihter et al., 2002
2008	Orlando/Baltimore	Shark	Carcharias taurus	Sand tiger shark	Adelphophagy	E2, T, P4, DHT	4	Se	10 mL	NM	Caudal venipuncture/Dorsal Postcardinal vein	15	0	Radioimmunoassay	66.3-80.7	Invasive	t test; ANOVA	Henningsen et al., 2008
1999	Heron Island	Shark	Hemiscyllium ocellatum	Eupaulette shark	Oviparous	E2, P4, T	3	P	1 mL	NM	NM	40	40	Radioimmunoassay	NM	Lethal	Kruskal Wallis	Heupel et al., 1999
2010	Dauphin Island	Shark	Rhizoprionodon terranovae	Atlantic Sharpnose shark	Placental viviparous	E2, T	2	P	2 mL	NM	Caudal venipuncture	76	0	ELISA	NM	Invasive	ANOVA/Tukey posthoc test	Hoffmayer et al., 2010
2018	Southern California	Rays	Urobatis halleri	Round stingrays	Histotrophy	E2, T, P4, F, Cort, E, 17H, S, E1, E3, 11-KT, A4, 11-DHC	13	P, H	10 mL	50 µL	Cardiac puncture	0	55	LC-ESI/MRM	NM	Lethal	Pearson correlation; t test	Lyons & Wynne/Edwards, 2019
1995	Florida	Shark	Sphyrna tiburo	Bonnethead shark	Placental viviparous	E2, T, P4, DHT	4	Se	NM	500 µL	Caudal venipuncture/Cardiac puncture	0	44	Radioimmunoassay	70-88	Lethal	Kruskal Wallis/ Dunn's test	Manire et al., 1995
1997	Florida	Shark	Sphyrna tiburo	Bonnethead shark	Placental viviparous	E2, T, P4, DHT	4	Se	NM	500 µL	Caudal venipuncture	62	0	Radioimmunoassay	NM	Lethal	Kruskal Wallis/ Dunn's test; One way ANOVA/ Student-Newman-Keuls	Manire et al., 1997
1999	Florida	Shark	Sphyrna tiburo	Bonnethead shark	Placental viviparous	E2, T, P4, DHT, 11KT, 11KA4, DHP,	7	Se	NM	50 µL	NM	32	28	Radioimmunoassay	84-87	Lethal	Kruskal Wallis/ Dunn's test; One way ANOVA/ Student-Newman-Keuls	Manire et al., 1999
2004	Florida	Shark	Sphyrna tiburo	Bonnethead shark	Placental viviparous	E2, T, P4	3	Se, Y	NM	500 µL (Se)	Caudal venipuncture	0	28	Radioimmunoassay	62-67.5	Lethal	Mann-Whitney/Kruskal Wallis/ Dunn's test	Manire et al., 2004
2018	California	Shark	Chiloscyllium plagiosum	White-spotted bamboo shark	Oviparous	E2, T, P4	3	P	2.5 mL	200-1000 µL	Caudal venipuncture	0	6	Radioimmunoassay	17-93	Invasive	REML	Nau et al., 2018
2015	Okinawa	Shark	Rhincodon typus	Whale shark	Lecitotrophic viviparous	E2, T, DHT	3	Se	NM	NM	Dorsal Postcardinal vein/Pectoral fins	0	3	ELISA	NM	Lethal	NM	Nozu et al., 2015
2018	Okinawa	Shark	Stegostoma fasciatum	Zebra shark	Oviparous	E2, T, P4	3	P	NM	NM	NM	3	4	ELISA	NM	Invasive	Anova/Holm posthoc test	Nozu et al., 2018
2018	Northwest Atlantic coast	Shark	Squalus acanthias	Spiny dogfish shark	Lecitotrophic viviparous	E2, T, P4	3	P	5 mL	400 µL	NM	0	5	Radioimmunoassay	71-90	Lethal	ANOVA/Tukey posthoc test	Prohaska et al., 2018
2018	Northern Gulf of Mexico	Shark	Rhizoprionodon terranovae	Atlantic Sharpnose shark	Placental viviparous	E2, T, P4	3	P	5 mL	400 µL	NM	0	5	Radioimmunoassay	60-91	Lethal	ANOVA/Tukey posthoc test	Prohaska et al., 2018
1993	Bahamas	Shark	Negaprion brevirostris	Lemon shark	Placental viviparous	E2, T, P4, DHT, Cort	5	Se	5-20 mL	NM	Caudal venipuncture	24	30	Radioimmunoassay	NM	Invasive	t test	Rasmussen & Gruber, 1993
1992	Florida	Shark	Carcharhinus plumbeus	Sandbar shark	Placental viviparous	E2, T, P4, DHT	4	Se	5 mL	NM	Caudal venipuncture/Dorsal Postcardinal vein	0	4	Radioimmunoassay	NM	Invasive	t test	Rasmussen & Muru, 1992
1992	Florida	Shark	Carcharhinus leucas	Bull shark	Placental viviparous	E2, T, P4, DHT	4	Se	5 mL	NM	Caudal venipuncture/Dorsal Postcardinal vein	0	1	Radioimmunoassay	NM	Invasive	t test	Rasmussen & Muru, 1992
1992	Florida	Shark	Negaprion brevirostris	Lemon shark	Placental viviparous	E2, T, P4, DHT	4	Se	5 mL	NM	Caudal venipuncture/Dorsal Postcardinal vein	0	1	Radioimmunoassay	NM	Invasive	t test	Rasmussen & Muru, 1992
2019	Caleta Valdés	Shark	Notorhynchus cepedianus	Broadnose sevengill shark	Lecitotrophic viviparous	E2, T, P4	3	P	5 mL	200 µL	NM	21	49	Radioimmunoassay	NM	Lethal	Generalized Linear Models	Suiero et al., 2019
2012	Guadalupe Island	Shark	Carcharodon carcharias	White shark	Oophagy	E2, T, P4	3	P	10 mL	NM	Caudal venipuncture	5	4	Radioimmunoassay	NM	Invasive	NM	Sulikowski et al., 2012
2016	Tiger Beach	Shark	Galeocerdo cuvier	Tiger shark	Embryotrotophy	E2, T, P4	3	P	20 mL	500 µL (x2)	Caudal venipuncture	2	18	Radioimmunoassay	59-84	Invasive	ANOVA/Tukey posthoc test	Sulikowski et al., 2016
2006	Western Mediterranean Sea	Shark	Centroscymnus coelolepis	Portuguese dogfish	Lecitotrophic viviparous	E2, T, P4	3	P	1-1.5 mL	NM	Cardiac puncture	0	12	Radioimmunoassay	NM	Lethal	NM	Tosti et al., 2006
2014	Cleveland Bay	Shark	Rhizoprionodon taylori	Australian Sharpnose shark	Placental viviparous	E2, T, P4	3	P	3 mL	100 µL	Caudal venipuncture	0	123	Radioimmunoassay	86-90	Lethal	Kruskal-Wallis/Bonferroni posthoc test	Waltricdk et al., 2014
2006	Florida (Lake George)	Rays	Hypanus sabinus	Freshwater Atlantic stingray	Histotrophy	T, E2	2	P	5ml	500𝜇l	Cardiac puncture	29	15	Radioimmunoassay	≥78.0	Lethal	One-way ANOVA/Tukey-Kramer; Kruskal-Wallis/Dunn	Gelsleichter et al., 2006
2018	Tennessee	Rays	Rhinoptera bonasus	Cownose rays	Histotrophy	E2, T, P4, An	4	P	1-3 ml	Nm	Caudal venipuncture	5	15	Radioimmunoassay	95.0/110.0	Invasive	Mixed general linear models/Bonferroni	Sheldon et al., 2018
2017	Swan Bay	Rays	Trygonorrhina dumerilii	Southern fiddler ray	Lecitotrophic viviparous	E2, T, P4	3	P	2 ml	200𝜇l	Caudal venipuncture	0	19	Radioimmunoassay	82.0/93.0	Invasive	Linear mixed effects models; Paired t-tests; Mann Whitney-Wilcoxon t-test	Guida et al., 2017
2007	Gulf of Maine	Rays	Malacoraja senta	Smooth skate	Oviparous	E2, T, P4	3	P	5-10 ml	Nm	Cardiac puncture	54	70	Radioimmunoassay	77.0/88.0	Lethal	Kruskal Wallis; Pearson correlation; two tailed t-test	Kneebone et al., 2007
2007	Gulf of Maine	Rays	Amblyraja radiata	Thorny skate	Oviparous	E2, T, P4	3	P	5-10 ml	Nm	Cardiac puncture	52	47	Radioimmunoassay	68.0/76.0	Lethal	Kruskal Wallis; Pearson correlation; two tailed t-test	Kneebone et al., 2007
1986	Maine	Rays	Leucoraja erinacea	Little skate	Oviparous	E2, T, P4	3	P	Nm	0.5 ml	Puncture of caudal sinus	0	16	Radioimmunoassay	80.9/93.9	Invasive	Nm	Koob et al., 1986
2008	California	Rays	Urobatis halleri	Round stingray	Histotrophy	T, 11-KT	2	P	Nm	Nm	Cardiac puncture	NM	NM	Radioimmunoassay	Nm	Lethal	Kruskal Wallis/Dunn	Mull et al., 2008
2007	Florida	Shark	Sphyrna tiburo	Bonnethead shark	Placental viviparous	Cort	1	P	Nm		Caudal venipuncture	149	146	Radioimmunoassay	89	Lethal	Kruskal Wallis/Dunn's Pairwise multiple Comparison Procedure	Manire et al., 2007
2007	Florida	Rays	Hypanus sabinus	Atlantic stingray	Histotrophy	Cort	1	P	Nm	25 & 75 𝜇l	Cardiac puncture	163	234	Radioimmunoassay	89	Lethal	Kruskal Wallis/Dunn's Pairwise multiple Comparison Procedure	Manire et al., 2007
2017	Japan	Rays	Mobula alfredi	Reef manta ray	Histotrophy	E2, T, P4, DHT	4	P	Nm	Nm	Caudal venipuncture	2	0	ELISA	Nm	Invasive	Nm	Nozu et al., 2017
1999	Florida	Rays	Raja eglanteria	Clearnose skate	Oviparous	E2, T, P4, DHT	4	P	1-2 ml	500𝜇l	Caudal venipuncture	20	78	Radioimmunoassay	70.0/88.0	Invasive	Student t-test; Mann-Whitney or Kruskal Wallis; Dunn	Rasmussen et al., 1999
2010	California	Rays	Urobatis halleri	Round stingray	Histotrophy	E2, T, P4	3	P	Nm	Nm	Cardiac puncture	NM	NM	Radioimmunoassay	Nm	Lethal	Kruskal Wallis/Dunn	Mull et al., 2010
2004	Gulf of Maine	Rays	Leucoraja ocellata	Winter skates	Oviparous	E2, T, P4	3	P	5-10 ml	0.4 ml	Cardiac puncture	64	66	Radioimmunoassay	68.0/76.0	Lethal	Kruskal-Wallis/Tukey; Pearson correlation	Sulikowski et al., 2004
2000	Florida	Rays	Hypanus sabinus	Atlantic stingray	Histotrophy	E2, T, P4, DHT	4	P	Nm	500𝜇l	Cardiac puncture	248	248	Radioimmunoassay	70.0/88.0	Lethal	Kruskal Wallis/Dunn; parametric ANOVA/Student-Newman-Keuls	Tricas et al., 2000
2007	Gulf of Maine	Rays	Leucoraja ocellata	Winter skate	Oviparous	T, E2	2	P	5-10 ml	Nm	Cardiac puncture	93	85	Radioimmunoassay	Nm	Lethal	Models	Sulikowski et al., 2007
2007	Gulf of Maine	Rays	Amblyraja radiata	Thorny skate	Oviparous	T, E2	2	P	5-10 ml	Nm	Cardiac puncture	18	89	Radioimmunoassay	Nm	Lethal	Models	Sulikowski et al., 2007
1997	Florida	Rays	Hypanus sabinus	Atlantic stingray	Histotrophy	E2, T, P4, DHT, Cort	5	P	5-10 ml	500𝜇l	Cardiac puncture	60	92	Radioimmunoassay	70.0/78.0	Lethal	Kruskal Wallis	Snelson et al., 1997
2006	Gulf of Maine	Rays	Amblyraja radiata	Thorny skate	Oviparous	T, E2	2	P	5-10 ml	0.4 mL	Cardiac puncture	77	93	Radioimmunoassay	68.0/77.0	Lethal	ANOVA/Tukey	Sulikowski et al., 2006
2008	California, Oregon & Washington	Chimera	Hydrolaguas colliei	Spotted ratfish	Oviparous	T, E2, 11 KT	3	P, M	Nm	500𝜇l, 500 mg	Cardiac puncture	0	140	Radioimmunoassay	69.0/111.0	Lethal	ANOVA	Barnett et al., 2009
1987	Maine	Sharks	Squalus acanthias	Spiny dogfish	Lecitotrophic viviparous	E2, T, P4	3	P	0.5-1 mL	50𝜇l	Caudal venipuncture	0	91	Radioimmunoassay	80-92	Lethal	Duncans multiple range test	Tsang and Callard et al., 1987
2008	Bay of Naples	Rays	Torpedo marmorata	Spotted ray	Histotrophy	E2, P4	2	P	NM	100 µL	Cardiac venipuncture	15	10	EIA	0.85	Lethal	Kruskal Wallis/Bonferroni	Prisco et al., 2008
1979	Caernarvon Bay	Sharks	Scyliorhinus canicula	Lesser spotted dogfish	Oviparous	E2, T	2	P	2 mL	50𝜇l	Caudal venipuncture	0	58	Radioimmunoassay	Nm	Lethal	ANOVA	Sumpter and Dodd, 1979
2005	Gulf of Maine	Rays	Leucoraja ocellata	Winter skate	Oviparous	E2, T	2	P	5-10 mL	0.4 mL	Cardiac venipuncture	96	88	Radioimmunoassay	74-76	Lethal	ANOVA/Tukey	Sulikowski et al., 2005
1999	Estación Biológica de Roscoff	Sharks	Scyliorhinus canicula	Lesser spotted dogfish	Oviparous	E2, T, P4, E1, 17H, 11KT, DHT, AN, A17	9	P, Testis	NM	NM	Cardiac venipuncture	157	0	Radioimmunoassay	35-85	Lethal	Mann Whitney	Garnier et al., 1999
1964	Aberdeen	Sharks	Squalus acanthias	Spiny dogfish shark	Lecitotrophic viviparous	DOC	1	Semen	NM	100 µL	Sperm sacs	40	0	PC	65	Lethal	NM	Simpson et al., 1964
1963	Aberdeen	Sharks	Squalus acanthias	Spiny dogfish shark	Lecitotrophic viviparous	DOC	1	Semen	NM	NM	Sperm sacs	?	?	PC	?	Lethal	?	Simpson et al., 1963
1967	Naples Bay	Sharks	Scyliorhinus stellaris	Nursehound	Oviparous	T, 17P5	2	Semen	19 g	NM	NM	5	0	TLC/GSC	34	NM	NM	Gottfried and Chieffi, 1967
2019	Monte Hermoso y Claromecó Argentina	Sharks	Mustelus schmitti	Narrownose smoot-hound shark	Placental viviparous	E2, T, P4	3	P	NM	0.5-1 Ml	Caudal venipuncture	0	123	Radioimmunoassay	0.95	Lethal	Generalized Additive Models	Elisio et al., 2019
2008	Bay of Naples	Rays	Torpedo marmorata	Spotted ray	Histotrophy	E2, T, P4, DHT	4	P, H, G	NM	NM	Cardiac venipuncture	0	33	Radioimmunoassay	85-90	Lethal		Fasano et al., 1992
1967	Bay of Naples	Rays	Torpedo marmorata	Spotted ray	Histotrophy	T, P4, CORT, E, F, DOC, E1, E3	8	P	5-12 mL	NM	Cardiac venipuncture	0	38	TLC/GLC	NM	Lethal		Di Prisco et al., 1967
2013	Maine	Shark	Squalus acanthias	Spiny dogfish shark	Lecitotrophic viviparous	E2, T, P4	3	M, G, P	5 g; 8 mL	2 g; 100 µL	Caudal venipuncture; Trunk down second dorsal fin	0	31	Radioimmunoassay	74-91	Lethal		Prohaska et al., 2013b
2013	Rhode Island	Shark	Rhizoprionodon terranovae	Atlantic Sharpnose shark	Placental viviparous	E2, T, P4	3	M, G, P	5 g; 8 mL	2 g; 100 µL	Caudal venipuncture; Trunk down second dorsal fin	0	24	Radioimmunoassay	74-91	Lethal		Prohaska et al., 2013b
2013	Maine	Rays	Leucoraja erinacea	Little skate	Oviparous	E2, T, P4	3	P, M	5 g; 8 mL	2 g; 100 µL	Caudal venipuncture; Trunk down second dorsal fin	0	14	Radioimmunoassay	74-91	Lethal		Prohaska et al., 2013b
2013	Maine	Rays	Leucoraja erinacea	Little skate	Oviparous	E2, P4	2	P	3 mL	NM	Caudal venipuncture	0	17	Radioimmunoassay	75-76	Non Lethal		Williams et al., 2013
2019	Okinawa	Shark	Rhincodon typus	Whale shark	Lecitotrophic viviparous	T, P4	2	P	NM	NM	Pectoral fin venipuncture	1	0	Time-Resolved Fluorescent antibody analysis	NM	Non Lethal	Kruskal Wallis	Matsumoto et al., 2019
2019	Delaware Bay	Sharks	Carcharias taurus	Sand tiger shark	Adelphophagy	T	1	P	15 mL	50 µL	Caudal venipuncture	81	0	EIA	98	Non Lethal		Wyffles et al., 2019
2020	Japan	Sharks	Prionace glauca	Blue shark	Placental viviparous	P4, E2	2	P	5 mL	NM	Caudal venipuncture	0	36	ELISA	52-83	Lethal	Kruskal Wallis	Fujinami et al., 2020
2019	Bimini	Rays	Hypanus americanus	Southern stingray	Histotrophy	T, P4, E2, E1	4	P	NM	50 µL	Caudal venipuncture	0	94	EIA	94-108	Non Lethal	Pearson correlation; t test	Mylniczenko et al., 2019
